# Supplementary material for: NOVA1 directs PTBP1 to hTERT pre-mRNA and promotes telomerase activity in cancer cells
Source: PubMed Central journal article supplement (PMC6474811; doi:10.1038/s41388-018-0639-8), 2018-12-19
Supplement: NIHMS1515994-supplement-1.pdf [file NIHMS1515994-supplement-1.pdf]

A

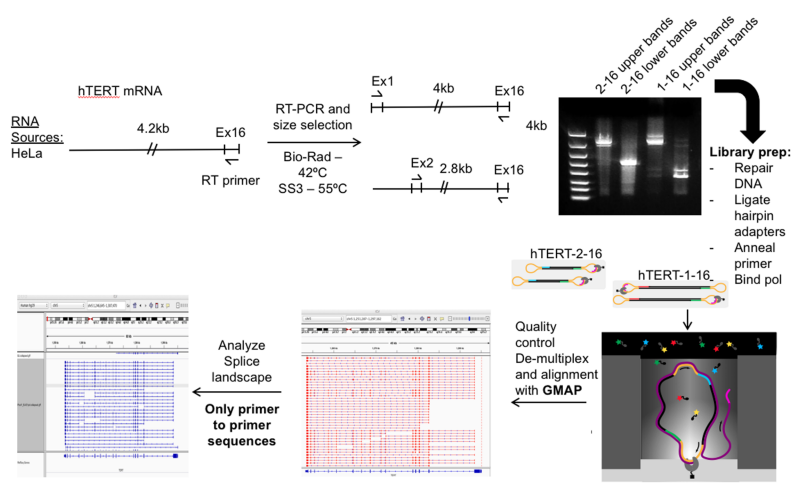

B

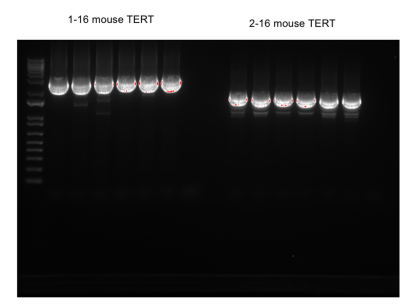

C

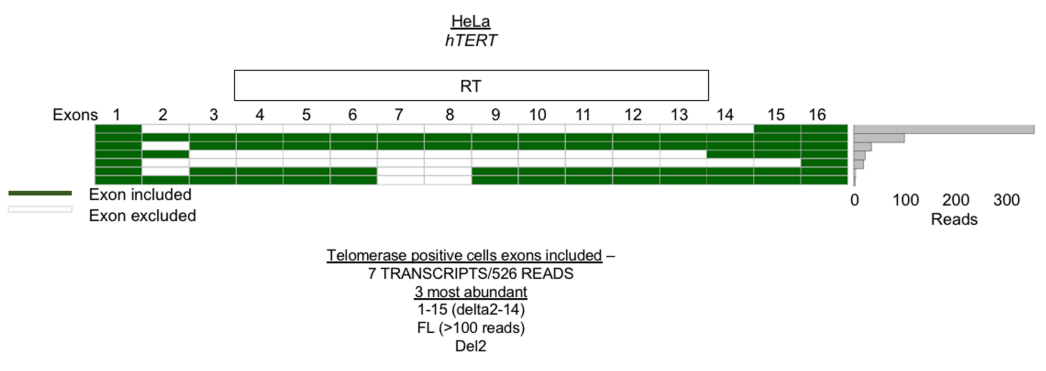

D

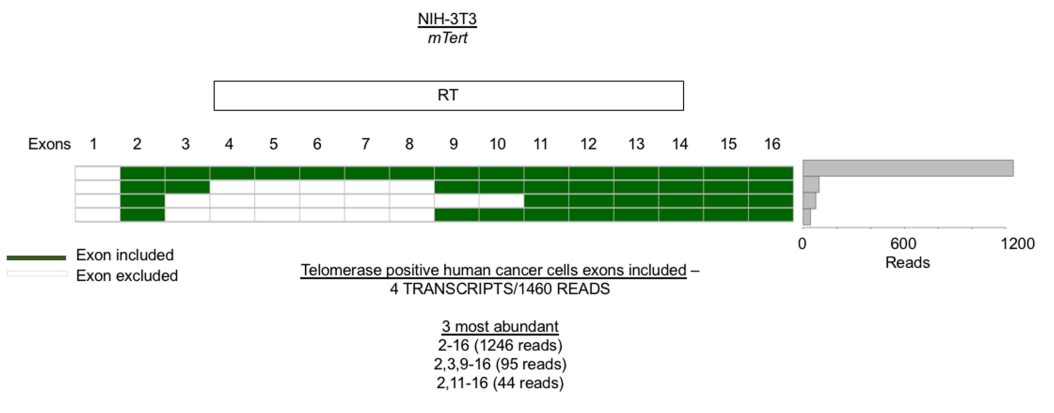

## Supplementary Figure 2

293T OE NOVA1 Cross-linked

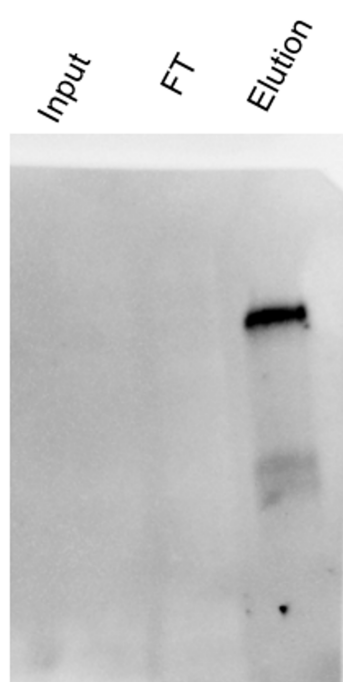

Anti-PTBP2
